# Supplementary material for: Treatment of Type 2 Diabetes and Outcomes in Patients With Heart Failure: A Nested Case–Control Study From the U.K. General Practice Research Database
Source: PubMed Central journal article supplement — Diabetes Care. 2010 Jun;33(6):1213–8. doi: 10.2337/dc09-2227 (PMC2875425; doi:10.2337/dc09-2227), 2010-06
Supplement: supp_dc09-2227_onlineappendix.pdf [file supp_dc09-2227_onlineappendix.pdf]

## e-Appendix 1: Read/OXMIS Codes

### Type 2 Diabetes

C109.00, C109200, C109600, 66A3.00, C109C00, C10y100, C100111, C105100, C109500, C100112, , C109000, C109300, C109400, C10z100, L180600, C109900, C104100, 66A4.00, C100100, C107100, C109B00, C107200, C109.11, C109A00, C101100, C109.12, C109100, C102100, C103100, C106100, C108900, C109700, C109.13, 250 AA, 250 AK, 250 AL, 250 AM, C109711, C109511, C109411, C109612, C109E12, C109611, C109B11, C109C11, C109H12, C109F12, C109D11, C109011, C109J00, C109E11, C109C12, C109J11, C109G00, C109212, C109112, C109712, C109H11, C109012, 66AV.00, C109412, C109D00, C109J12, C109211, C109D12, C109K00, C10F.00, C10FC00, C10FJ00, C109E00, C10FH00, C109F11, C10F600, C10F900, C10FM00, C109A11, C10FA00, C10FN00, C10FK00, C10FL00, C10FF00, C10F200, C10FE00, C10F700, C10F400, C10F000, C10F500, C10FB00, C10FQ00, C10FP00, C10FD00, C10F100, C109G11, C109G12, C10F300 , C10FG00 , C10F.11, C10FL11, C109111, C10FC11, C109911, C10FJ11, C10F011, C10F611, C10FR00, C10F711, C10F911, C10F311, C10FB11, C10F511, C10FF11

### Heart failure

3912F, G232.00, SP11111, 4270CC, 33BA.00, G1yz100, G1yz100, G582.00 , 7824BP , 7824FM, G58z.12, Q490.00 , 4270BN, 14A6.00, G580.13, G580000 , 4270D , 4271B , G580.00, G581.13, G581000, SP11100, L4271RF, 4270BD, G580100, G580200, G581.00, G580300 , 4270LW , 428 AT, 14AM.00, L09y200, L4271LF , 402 C , 428 A , 8B29.00 , 4270BT , 4270R , G580.11, G58z.00, G5y4z00, 4270DR, G58..00, G58..11, G580.12, G58z.11, Q48y100, 4270 , 4270C, 4271 , 4271H , 428 AM,7824FC, 7824FH , 4271A , 7824AC, 7824BW, 662T.00, 8HBE.00, 662W.00, 68B6.00, 1O1..00, ZRad.00, 1J60.00, 8HTL.00, 9N2p.00, 9N0k.00, 8HHb.00, 8H2S.00, 9Or..00, 8CL3.00, 8Hk0.00, 9N6T.00, 8HHz.00, 9Or0.00, 8HTI.00, 67D4.00

## e-Appendix 2: GPRD Product codes

### Acarbose

4012256, 4012255, 1084002, 1084001

### Chlorpropamide

4004450, 4004463, 4005595, 4005596, 4010412, 4010413, 4005147, 4060737,  
4002934, 3244001, 3244002

### Glibenclamide

4004516, 4005643, 4005644, 4013453, 4734001, 4009186, 4009190, 4098001,  
4066551, 4005612, 4005613, 4006610, 4082092, 4057177, 4081052, 4082093,  
4081051, 2872001, 2872002

### Gliclazide

4089529, 4085652, 4070570, 3981001, 4069149, 4092097, 3716002, 4003631,  
3716001

### Glimepiride

4074283, 4074282, 4074281, 4074284, 1550003, 1550002, 1644001, 1550001

### Glipizide

4099867, 4008361, 4008362, 4002885, 3717001, 3717002

### Gliquidone

4065680, 3719001

### Insulin

4000201, 4000205, 4000445, 4000446, 4000449, 4000452, 4000453, 4002256,  
4006704, 4008116, 4008119, 4009609, 4009610, 4009612, 4009618, 4009895,  
4009897, 4013115, 4013123, 4013124, 4013125, 4013126, 4013238, 4013239,  
4013240, 4013245, 4013288, 4013967, 4014412, 4053792, 4055647, 4056197,  
4056729, 4057117, 4057118, 4057119, 4058866, 4058867, 4058868, 4058869,  
4059796, 4060280, 4060281, 4061576, 4062212, 4067569, 4067570, 4067571,  
4067581, 4067582, 4067583, 4069721, 4072128, 4072134, 4072136, 4072924,

4073546, 4074571, 4081653, 4082011, 4082012, 4085407, 4089555, 4089556, 4091150, 4095316, 4095328, 4101281, 4114046, 4115562, 4122913, 4122915, 3510609, 3510610, 3934001, 3936001, 3937001, 3938001, 3939001, 3940001, 3941001, 3942001, 3943001, 3944001, 3945001, 3946001, 3946002, 3946003, 3947001, 3948001, 3954001, 5051001, 5677001, 7623001, 7623002, 7623003, 8241001, 8839001, 9301001, 9302001, 9302002, 9302003, 9308001, 9309001, 9310001, 9311001, 9312001, 9313001, 9314001, 9315001, 9315002, 9315003, 9316001, 9316002, 9317001, 9317002, 9317003, 9318001, 9318002, 9318003, 9620001, 9987001, 0009001, 0009002, 0111001, 0444001, 1996001, 2032001, 2032002, 2526001, 3446001, 3448001, 3450001, 3680001, 3681001, 3682001, 3683001, 3684001, 3687001, 3688001, 3689001, 3690001, 3691001, 3693001, 3694001, 3695001, 3696001, 3698001, 3699001, 3701001, 3704001, 3705001, 3708001, 3711001, 3714001, 3715001, 3716001, 3717001, 3718001, 3720001, 3721001, 3723001, 3724001, 3725001, 3727001, 3728001, 3729001, 3730001, 3731001, 3733001, 3734001, 3735001, 3736001, 3737001, 3738001, 3739001, 3740001, 3743001, 3744001, 3745001, 3746001, 3747001, 3748001, 3749001, 3750001, 3751001, 3752001, 3753001, 3754001, 3756001, 3757001, 3758001, 3759001, 3760001, 3761001, 3762001, 3763001, 3784001, 3785001, 3805001, 3806001, 3808001, 3809001, 3810001, 3811001, 3812001, 3813001, 3814001, 3815001, 3819001, 3820001, 3821001, 3822001, 3823001, 3824001, 3825001, 3826001, 3830001, 3831001, 3918001, 3919001, 3921001, 3922001, 3952001, 3953001, 3954001, 3955001, 3970001, 3971001

#### Metformin

2912001, 2912002, 4008628, 2945001, 4008629, 4103642, 4008779, 2463001, 4023931, 4023932, 4004522, 4008780, 4325001, 4085817, 4004523, 4085816, 4004668, 4079911, 4079912, 4089535, 4091467, 4091468, 4091513, 4091514, 4444001, M14445001, M14593001

#### Nateglinide

M11867001, M11867002, M11867003, 4090534, 4090535, 4090536

#### Pioglitazone

M07762002, M07762001, M12114001, 4088147, 4088146, 4109393

#### Repaglinide

M08075003, M08075002, M08075001, 4080468, 4080467, 4080444

#### Rosiglitazone

M10236002, M10236003, M10236001

Tolbutamide

4005158, M04851001,4004447, 4081066, M02890001
